# Supplementary material for: Microbial Diversity in Deep-sea Methane Seep Sediments Presented by SSU rRNA Gene Tag Sequencing
Source: PubMed Central journal article supplement (PMC4103545; doi:10.1264/jsme2.me12032), 2012-04-18
Supplement: 27_382_s1.pdf [file 27_382_s1.pdf]

Table S1. Archaeal SSU rRNA gene primer sequences constructed in this study

| Name                | Sequence (5' - 3')   | group coverage | Proportion in mixtures |
|---------------------|----------------------|----------------|------------------------|
| Archaeal set        |                      |                |                        |
| 530F mixture (Arch) |                      |                |                        |
| Arch 530F           | GTGBCAGCCGCCGCGG     | 2, 3, 4        | 24                     |
| Arch2 530F          | YTGCCAGCCGCCGCGG     | 5, 6           | 6                      |
| Nano 530F           | GTGGCAGTCGCCACGG     | 15             | 3                      |
| 907R mixture (Arch) |                      |                |                        |
| Arch 907R           | CCGCCAATTCCTTTAAGTTT | 4              | 10                     |
| SAGMEG 907R         | CCGCCAATTTCTTTAAGTTT | 5              | 1                      |
| Arch2 907R          | CCGYCAATTCCTTMAAGTTT | 9, 13, 15      | 1                      |
| DSEG SAGMEGB 907R   | CCGCCAATTCCTTAAGTTT  | 10, 30         | 1                      |
| Nano 907R           | CCGCCTATTCCTTTAAGTTT | 14             | 1                      |

Archaeal set was not used in this study.

Table S2. Comparison of sequences between consensus sequences in Table 1 and SSU rRNA gene sequence in SILVA SSURef database in 2011. In the database, we identified archaeal 13022, bacterial 282285 and eukaryotic 36054 sequences that harbor both 530F and 907R regions.

(A)

|                 | Number of sequences |        | Number of sequences without mismatch residues compared to 530F primers |      |     |    |    |     |    |     |     |    |    |     |    | Total sequences | Coverage (%) |    |        |      |
|-----------------|---------------------|--------|------------------------------------------------------------------------|------|-----|----|----|-----|----|-----|-----|----|----|-----|----|-----------------|--------------|----|--------|------|
|                 | harbor 530F region  |        | 1                                                                      | 2    | 3   | 4  | 5  | 6   | 7  | 8   | 9   | 10 | 11 | 12  | 13 |                 |              | 14 | 15     |      |
| <i>Archaea</i>  | 13022               | 214    | 6980                                                                   | 4724 | 358 | 35 | 55 | 0   | 0  | 0   | 0   | 0  | 0  | 0   | 0  | 0               | 0            | 38 | 12404  | 95.2 |
| <i>Bacteria</i> | 282285              | 271887 | 62                                                                     | 0    | 1   | 1  | 2  | 557 | 69 | 562 | 120 | 5  | 63 | 474 | 73 | 0               | 0            | 0  | 273876 | 97.0 |
| <i>Eukarya</i>  | 36054               | 33165  | 78                                                                     | 0    | 0   | 0  | 0  | 496 | 0  | 38  | 1   | 0  | 0  | 6   | 0  | 0               | 0            | 0  | 33784  | 94.0 |

(B)

|                 | Number of sequences |        | Number of sequences without mismatch residues compared to the 907R consensus sequences |       |       |     |      |     |     |    |     |      |    |     |    |    |    |     |    |     |    |    |    |      |      | Total sequences | Coverage (%) |        |       |       |      |
|-----------------|---------------------|--------|----------------------------------------------------------------------------------------|-------|-------|-----|------|-----|-----|----|-----|------|----|-----|----|----|----|-----|----|-----|----|----|----|------|------|-----------------|--------------|--------|-------|-------|------|
|                 | harbor 907R region  |        | 1                                                                                      | 2     | 3     | 4   | 5    | 6   | 7   | 8  | 9   | 10   | 11 | 12  | 13 | 14 | 15 | 16  | 17 | 18  | 19 | 20 | 21 | 22   | 23   |                 |              | 24     | 25    | 26    |      |
| <i>Archaea</i>  | 12404               | 1      | 82                                                                                     | 1     | 11052 | 155 | 17   | 0   | 1   | 87 | 138 | 0    | 10 | 59  | 63 | 13 | 0  | 0   | 17 | 0   | 0  | 0  | 0  | 0    | 0    | 0               | 0            | 0      | 138   | 11834 | 90.1 |
| <i>Bacteria</i> | 273876              | 215442 | 1104                                                                                   | 38076 | 11    | 0   | 1739 | 422 | 573 | 0  | 0   | 3732 | 21 | 2   | 0  | 0  | 7  | 266 | 0  | 103 | 46 | 39 | 63 | 5983 | 1339 | 238             | 0            | 269206 | 95.4  |       |      |
| <i>Eukarya</i>  | 33784               | 13     | 27652                                                                                  | 0     | 48    | 8   | 0    | 0   | 4   | 0  | 0   | 0    | 1  | 363 | 1  | 2  | 0  | 0   | 0  | 0   | 0  | 0  | 0  | 0    | 3    | 0               | 0            | 0      | 28095 | 77.9  |      |

Table S3. Coverage of 530F and 907R primers targeting SILVA SSURef database at the end of 2011. In the database, we identified archaeal 13022, bacterial 282285 and eukaryotic 36054 sequences that harbor both 530F and 907R regions.

(A) Number of sequences without mismatch residues compared to 530F primers used in archaeal set

|                                        | <i>Archaea</i> | <i>Bacteria</i> | <i>Eukarya</i> |
|----------------------------------------|----------------|-----------------|----------------|
| Arch_530F                              | 12062          | 63              | 78             |
| Arch2_530F                             | 90             | 3               | 0              |
| Nano_530F                              | 38             | 0               | 0              |
| Total                                  | 12190          | 66              | 78             |
| Coverage (%) without mismatch residues | 93.6           | 0.0             | 0.2            |

(B) Number of sequences with 1 mismatch residues compared to 530F primers used in archaeal set

|                                      | <i>Archaea</i> | <i>Bacteria</i> | <i>Eukarya</i> |
|--------------------------------------|----------------|-----------------|----------------|
| Arch_530F                            | 298            | 490             | 49             |
| Arch2_530F                           | 12             | 222             | 16             |
| Nano_530F                            | 9              | 0               | 0              |
| Total                                | 319            | 712             | 65             |
| Coverage (%) with 1 mismatch residue | 2.4            | 0.3             | 0.2            |

(C) Number of sequences without mismatch residues compared to 907R primers used in archaeal set

|                                        | <i>Archaea</i> | <i>Bacteria</i> | <i>Eukarya</i> |
|----------------------------------------|----------------|-----------------|----------------|
| Arch_907R                              | 11052          | 11              | 48             |
| Arch2_907R                             | 159            | 4               | 368            |
| SAGMEG_907R                            | 155            | 0               | 8              |
| DSEG_SAGMEGB_907R                      | 138            | 0               | 0              |
| Nano_907R                              | 63             | 0               | 1              |
| Total                                  | 11567          | 15              | 425            |
| Coverage (%) without mismatch residues | 88.8           | 0.0             | 1.2            |

(D) Number of sequences without mismatch residues compared to 907R primers used in archaeal set

|                                      | <i>Archaea</i> | <i>Bacteria</i> | <i>Eukarya</i> |
|--------------------------------------|----------------|-----------------|----------------|
| Arch_907R                            | 357            | 15              | 37             |
| Arch2_907R                           | 13             | 256             | 72             |
| SAGMEG_907R                          | 16             | 1               | 5              |
| DSEG_SAGMEGB_907R                    | 26             | 0               | 0              |
| Nano_907R                            | 27             | 17              | 31             |
| Total                                | 439            | 289             | 145            |
| Coverage (%) with 1 mismatch residue | 3.4            | 0.1             | 0.4            |

Table S4. Tag and OTU abundance of each taxon/division in SSU rRNA gene community structures at 5 and 25 cmbsf in methane seep sediment core 949C3, and abundance of shared tags and OTUs between the two depths. Characterization of each tag-sequence was based on top hit sequences of each tag sequence in Blast analysis. Tags with more than 98% identity were assigned as same OTU.

|                                                             | Tags        |             |             |             | OTUs        |            |             |            |
|-------------------------------------------------------------|-------------|-------------|-------------|-------------|-------------|------------|-------------|------------|
|                                                             | 5 cmbsf     |             | 25 cmbsf    |             | 5 cmbsf     |            | 25 cmbsf    |            |
|                                                             | Total       | Shared      | Total       | Shared      | Total       | Shared     | Total       | Shared     |
| <b>Archaea</b>                                              |             |             |             |             |             |            |             |            |
| Ancient Archaeal Group (AAG)                                | 0           | 0           | 15          | 0           | 0           | 0          | 6           | 0          |
| Deep Sea Archaeal Group (DSAG)                              | 17          | 17          | 90          | 78          | 4           | 4          | 12          | 4          |
| Marine Group 1 (MG1)                                        | 535         | 376         | 81          | 77          | 50          | 8          | 12          | 8          |
| Miscellaneous Crenarchaeotic Group (MCG)                    | 2           | 2           | 44          | 14          | 2           | 2          | 16          | 2          |
| Deep Sea Hydrothermal Vent Euryarchaeotic Group 6 (DHVEG 6) | 74          | 17          | 162         | 2           | 47          | 2          | 120         | 2          |
| Deep Sea Euryarchaeotic Group (DSEG)                        | 0           | 0           | 5           | 0           | 0           | 0          | 5           | 0          |
| Marine Hydrothermal Vent Group (MHVG)                       | 0           | 0           | 10          | 0           | 0           | 0          | 8           | 0          |
| Miscellaneous Euryarchaeotic Group (MEG)                    | 0           | 0           | 4           | 0           | 0           | 0          | 4           | 0          |
| ANMEs                                                       | 5           | 3           | 51          | 21          | 3           | 1          | 7           | 1          |
| uncultured Thermoplasmatales                                | 0           | 0           | 116         | 0           | 0           | 0          | 46          | 0          |
| other archaea                                               | 46          | 14          | 140         | 22          | 26          | 2          | 81          | 2          |
| <b>Total (Archaea)</b>                                      | <b>679</b>  | <b>429</b>  | <b>718</b>  | <b>214</b>  | <b>132</b>  | <b>19</b>  | <b>317</b>  | <b>19</b>  |
| <b>Bacteria</b>                                             |             |             |             |             |             |            |             |            |
| Acidobacteria                                               | 311         | 167         | 290         | 158         | 161         | 49         | 125         | 49         |
| <i>Armatimonadetes</i> (OP10)                               | 1           | 0           | 6           | 0           | 1           | 0          | 6           | 0          |
| <i>Bacteroidetes</i>                                        |             |             |             |             |             |            |             |            |
| <i>Bacteroidia</i>                                          | 143         | 124         | 9           | 4           | 18          | 3          | 8           | 3          |
| <i>Cytophagia</i>                                           | 130         | 100         | 99          | 92          | 33          | 9          | 15          | 9          |
| <i>Flavobacteria</i>                                        | 214         | 112         | 57          | 45          | 50          | 9          | 18          | 9          |
| <i>Sphingobacteria</i>                                      | 68          | 11          | 23          | 12          | 29          | 4          | 13          | 4          |
| other <i>Bacteroidetes</i>                                  | 127         | 59          | 107         | 71          | 50          | 12         | 36          | 12         |
| <i>Chlamydiae</i>                                           | 2           | 0           | 3           | 0           | 2           | 0          | 3           | 0          |
| <i>Chlorobi</i>                                             | 45          | 29          | 105         | 84          | 18          | 7          | 17          | 7          |
| <i>Chloroflexi</i>                                          | 94          | 48          | 538         | 212         | 52          | 17         | 178         | 17         |
| <i>Deferribacteres</i>                                      | 28          | 14          | 108         | 69          | 23          | 11         | 38          | 11         |
| <i>Elastimicrobia</i> (TM1)                                 | 4           | 0           | 8           | 0           | 4           | 0          | 6           | 0          |
| <i>Fibrobacteres</i>                                        | 6           | 1           | 9           | 1           | 4           | 1          | 7           | 1          |
| <i>Firmicutes</i>                                           | 115         | 19          | 20          | 2           | 24          | 2          | 14          | 2          |
| <i>Fusobacteria</i>                                         | 5           | 4           | 36          | 25          | 5           | 4          | 8           | 4          |
| <i>Gemmatimonadetes</i>                                     | 104         | 48          | 98          | 55          | 46          | 12         | 36          | 12         |
| <i>Lentisphaerae</i>                                        | 66          | 13          | 24          | 12          | 28          | 5          | 17          | 5          |
| <i>Nitrospirae</i>                                          | 47          | 20          | 105         | 45          | 31          | 12         | 55          | 12         |
| <i>Planctomycetes</i>                                       | 453         | 168         | 370         | 156         | 258         | 64         | 214         | 64         |
| <i>Proteobacteria</i>                                       |             |             |             |             |             |            |             |            |
| <i>Alphaproteobacteria</i>                                  |             |             |             |             |             |            |             |            |
| <i>Rhizobiales</i>                                          | 34          | 12          | 22          | 8           | 18          | 5          | 13          | 5          |
| <i>Rhodobacteriales</i>                                     | 62          | 33          | 64          | 55          | 26          | 5          | 14          | 5          |
| <i>Rhodospirillales</i>                                     | 206         | 66          | 26          | 19          | 90          | 8          | 14          | 8          |
| other <i>Alphaproteobacteria</i>                            | 81          | 27          | 20          | 16          | 36          | 2          | 6           | 2          |
| <i>Betaproteobacteria</i>                                   | 41          | 30          | 37          | 33          | 11          | 3          | 7           | 3          |
| <i>Deltaproteobacteria</i>                                  |             |             |             |             |             |            |             |            |
| SAR324                                                      | 62          | 26          | 31          | 21          | 17          | 4          | 10          | 4          |
| <i>Bdellovibrionales</i> <i>Bacteriovoraceae</i>            | 34          | 6           | 22          | 15          | 29          | 3          | 9           | 3          |
| <i>Desulfurales</i> <i>Desulfuraceae</i>                    | 16          | 11          | 67          | 40          | 7           | 4          | 20          | 4          |
| <i>Desulfobacteriales</i> <i>Desulfobacteraceae</i>         | 1255        | 1074        | 906         | 772         | 130         | 46         | 116         | 46         |
| <i>Desulfobacteriales</i> <i>Desulfobulbaceae</i>           | 34          | 11          | 52          | 46          | 10          | 3          | 9           | 3          |
| <i>Desulfobacteriales</i> <i>Nitrospiraceae</i>             | 75          | 51          | 45          | 14          | 21          | 6          | 22          | 6          |
| other <i>Desulfobacteriales</i>                             | 6           | 4           | 22          | 8           | 3           | 1          | 12          | 1          |
| <i>Desulfosomnoidales</i> <i>Desulfosomnoidaceae</i>        | 60          | 0           | 3           | 0           | 5           | 0          | 3           | 0          |
| <i>Desulfosomnoidales</i> <i>Geebacteriaceae</i>            | 16          | 5           | 10          | 4           | 10          | 2          | 6           | 2          |
| other <i>Desulfosomnoidales</i>                             | 45          | 27          | 14          | 12          | 18          | 4          | 6           | 4          |
| <i>Desulfosporimoniales</i>                                 | 1           | 0           | 1           | 0           | 1           | 0          | 1           | 0          |
| <i>Mycoscoziales</i>                                        | 59          | 21          | 75          | 39          | 35          | 4          | 34          | 4          |
| <i>Syntrophobacteriales</i>                                 | 32          | 24          | 87          | 77          | 9           | 1          | 7           | 1          |
| other <i>Deltaproteobacteria</i>                            | 241         | 109         | 155         | 92          | 122         | 31         | 76          | 31         |
| <i>Epsilonproteobacteria</i>                                |             |             |             |             |             |            |             |            |
| <i>Campylobacteriales</i> <i>Campylobacteraceae</i>         | 159         | 1           | 2           | 1           | 25          | 1          | 2           | 1          |
| <i>Campylobacteriales</i> <i>Helicobacteraceae</i>          | 539         | 443         | 260         | 238         | 47          | 8          | 29          | 8          |
| <i>Nastelliales</i>                                         | 5           | 0           | 1           | 0           | 3           | 0          | 1           | 0          |
| other <i>Epsilonproteobacteria</i>                          | 0           | 0           | 1           | 0           | 0           | 0          | 1           | 0          |
| <i>Gammaproteobacteria</i>                                  |             |             |             |             |             |            |             |            |
| <i>Acidithiobacterales</i> <i>Acidithiobacillaceae</i>      | 265         | 241         | 525         | 486         | 28          | 15         | 40          | 15         |
| <i>Alteromonadales</i>                                      | 57          | 33          | 45          | 43          | 20          | 6          | 8           | 6          |
| B47.8                                                       | 82          | 81          | 101         | 101         | 2           | 1          | 1           | 1          |
| <i>Chromatiales</i> <i>Chromatiaceae</i>                    | 47          | 39          | 20          | 17          | 11          | 5          | 8           | 5          |
| <i>Chromatiales</i> <i>Ectothiorhodospiraceae</i>           | 7           | 3           | 9           | 2           | 4           | 2          | 6           | 2          |
| <i>Chromatiales</i> <i>Grandisociococcaceae</i>             | 6           | 1           | 6           | 6           | 5           | 1          | 1           | 1          |
| <i>Chromatiales</i> <i>Nitrosooccus</i>                     | 1           | 1           | 4           | 4           | 1           | 1          | 1           | 1          |
| <i>Methylocoziales</i>                                      | 277         | 246         | 72          | 63          | 32          | 8          | 13          | 8          |
| <i>Oceanospirillales</i>                                    | 57          | 20          | 40          | 35          | 25          | 4          | 9           | 4          |
| other sulfur-oxidizing group                                | 179         | 173         | 271         | 264         | 13          | 9          | 13          | 9          |
| <i>Thiotrichales</i> <i>Psycricetiaaceae</i>                | 97          | 57          | 68          | 54          | 21          | 6          | 13          | 6          |
| other <i>Thiotrichales</i>                                  | 138         | 123         | 122         | 104         | 25          | 14         | 30          | 14         |
| <i>Xanthomonadales</i>                                      | 189         | 124         | 119         | 103         | 58          | 19         | 24          | 19         |
| other <i>Gammaproteobacteria</i>                            | 301         | 166         | 415         | 312         | 115         | 25         | 98          | 25         |
| <i>Zetaproteobacteria</i>                                   | 1           | 1           | 10          | 6           | 1           | 1          | 4           | 1          |
| other <i>Proteobacteria</i>                                 | 52          | 23          | 70          | 58          | 21          | 5          | 17          | 5          |
| <i>Spirochaetes</i>                                         | 160         | 103         | 57          | 24          | 30          | 7          | 25          | 7          |
| <i>Tenericutes</i>                                          | 39          | 0           | 2           | 0           | 14          | 0          | 1           | 0          |
| <i>Verrucomicrobia</i>                                      | 6           | 0           | 1           | 0           | 4           | 0          | 1           | 0          |
| BRC1                                                        | 19          | 2           | 14          | 2           | 16          | 2          | 13          | 2          |
| OD1                                                         | 3           | 0           | 12          | 0           | 2           | 0          | 12          | 0          |
| OP3                                                         | 27          | 8           | 44          | 9           | 18          | 4          | 29          | 4          |
| OP9                                                         | 2           | 2           | 32          | 5           | 1           | 1          | 3           | 1          |
| OP11                                                        | 0           | 0           | 6           | 0           | 0           | 0          | 5           | 0          |
| SR1                                                         | 56          | 0           | 4           | 0           | 35          | 0          | 3           | 0          |
| TM7                                                         | 1           | 0           | 1           | 0           | 1           | 0          | 1           | 0          |
| WS3                                                         | 60          | 30          | 112         | 51          | 29          | 15         | 56          | 15         |
| TA06                                                        | 24          | 13          | 59          | 12          | 14          | 6          | 38          | 6          |
| TM6                                                         | 38          | 14          | 34          | 7           | 23          | 3          | 28          | 3          |
| other <i>Bacteria</i>                                       | 813         | 443         | 759         | 528         | 256         | 27         | 230         | 27         |
| <b>Total (Bacteria)</b>                                     | <b>8030</b> | <b>4865</b> | <b>6972</b> | <b>4849</b> | <b>2335</b> | <b>549</b> | <b>1973</b> | <b>549</b> |

Table S5. Diversity and richness indexes of whole microbial community structures and each taxon/division at 5 and 25 cmbsf in methane seep sediment core 949C3. Tags with more than 98% identity were assigned as same OTU.

|                              | Tags    |          | OTUs    |          | Chao1   |          | ACE     |          | Shannon |          | Shannon evenness |          | Simpson |          |
|------------------------------|---------|----------|---------|----------|---------|----------|---------|----------|---------|----------|------------------|----------|---------|----------|
|                              | 5 cmbsf | 25 cmbsf | 5 cmbsf | 25 cmbsf | 5 cmbsf | 25 cmbsf | 5 cmbsf | 25 cmbsf | 5 cmbsf | 25 cmbsf | 5 cmbsf          | 25 cmbsf | 5 cmbsf | 25 cmbsf |
| Total                        | 8709    | 7690     | 2473    | 2296     | 6558.0  | 6374.0   | 11117.8 | 11269.3  | 6.49    | 6.54     | 0.83             | 0.84     | 0.0063  | 0.0055   |
| DHVEG6                       | 74      | 162      | 47      | 120      | 130.3   | 405.0    | 151.5   | 436.8    | 3.45    | 4.65     | 0.90             | 0.97     | 0.0504  | 0.0054   |
| MGI                          | 535     | 81       | 50      | 12       | 65.5    | (22.5)   | 71.7    | (23.5)   | 2.22    | (1.10)   | 0.57             | (0.44)   | 0.2776  | (0.5701) |
| <i>Acidobacteria</i>         | 311     | 290      | 161     | 125      | 426.4   | 200.9    | 607.3   | 339.4    | 4.64    | 4.44     | 0.91             | 0.92     | 0.0173  | 0.0149   |
| <i>Bacteroidetes</i>         | 682     | 295      | 182     | 90       | 431.8   | 192.2    | 696.2   | 306.8    | 4.21    | 3.77     | 0.81             | 0.84     | 0.0388  | 0.0400   |
| <i>Chloroflexi</i>           | 94      | 538      | 51      | 179      | 100.6   | 456.9    | 156.0   | 812.7    | 3.68    | 4.39     | 0.94             | 0.85     | 0.0229  | 0.0244   |
| <i>Planctomycetes</i>        | 453     | 370      | 257     | 214      | 568.5   | 582.2    | 984.5   | 1125.6   | 5.21    | 5.06     | 0.94             | 0.94     | 0.0067  | 0.0068   |
| <i>Alphaproteobacteria</i>   | 383     | 132      | 170     | 47       | 400.2   | 117.9    | 732.3   | 193.1    | 4.59    | 2.96     | 0.89             | 0.77     | 0.0172  | 0.1194   |
| <i>Gammaproteobacteria</i>   | 1703    | 1817     | 362     | 278      | 880.0   | 616.9    | 1214.8  | 986.3    | 4.68    | 4.08     | 0.79             | 0.72     | 0.0226  | 0.0544   |
| <i>Deltaproteobacteria</i>   | 1936    | 1490     | 415     | 331      | 1103.0  | 767.2    | 1649.2  | 1260.9   | 4.39    | 4.61     | 0.73             | 0.79     | 0.0443  | 0.0227   |
| <i>Epsilonproteobacteria</i> | 703     | 264      | 75      | 33       | 123.2   | 222.0    | 195.6   | 439.0    | 2.37    | 1.68     | 0.55             | 0.48     | 0.2091  | 0.3396   |

Tag population of the MGI at 25cmbsf was smaller than 100, and excluded from the discussion.
